# Supplementary material for: “The phactalysts”: carbon nanotube/TiO2composites as phototropic actuators for wireless remote triggering of chemical reactions and catalysis
Source: Royal Society of Chemistry journal article supplement (doi:10.1039/c7nr05104b), 2017-01-01
Supplement: c7nr05104b1.pdf [file c7nr05104b1.pdf]

Supporting Information

**“The Phactalysts”: Carbon Nanotube/TiO<sub>2</sub>  
Composites as Phototropic Actuators for  
Wireless Remote Triggering of Chemical  
Reactions and Catalysis**

*Irene Vassalini,\* and Ivano Alessandri\**

**S1. Supplementary Movie:** Real-time video showing the typical actuation of a phactalyst under illumination with the halogen lamp (file uploaded separately).

**S2. Average maximum bending angle as a function of different SWNT:TiO<sub>2</sub> weight ratios.**

| Suspension concentration                     | average maximum bending angle |                                                                                       |
|----------------------------------------------|-------------------------------|---------------------------------------------------------------------------------------|
| TiO <sub>2</sub> 0.5 mg/mL                   | 0°                            |    |
| SWNT 0.025 mg/mL+ TiO <sub>2</sub> 0.5 mg/mL | 0°                            |    |
| SWNT 0.25 mg/mL+ TiO <sub>2</sub> 0.5 mg/mL  | 10°                           |   |
| SWNT 0.5 mg/mL+ TiO <sub>2</sub> 0.25 mg/mL  | 30°                           |  |
| SWNT 0.5 mg/mL                               | 60°                           |  |
| SWNT 0.5 mg/mL+ TiO <sub>2</sub> 0.5 mg/mL   | 90°                           |  |
| SWNT 0.5 mg/mL+ TiO <sub>2</sub> 1 mg/mL     | 90°                           |  |

Table S2.

### **S3. Study of the photocatalytic activity of PC/SWNT+TiO<sub>2</sub> bimorph system as a function of the SWNT:TiO<sub>2</sub> weight ratios.**

The photocatalytic activity of bimorphs obtained filtering on PC filters suspensions containing different SWNT:TiO<sub>2</sub> weight ratio was evaluated during the photodegradation of 15 mL of Methylene Blue (MB) 10<sup>-5</sup> M bulk solution. The effect of different SWNT:TiO<sub>2</sub> ratio on dye absorption capability was also investigated by measuring the percentage of adsorbed dye on the solid system maintained for 1h in dark (**Fig. S3a**), and the photodegradation efficiency was tested under UV illumination (**Fig. S3b**).

Systems containing a higher relative amount of SWNT are characterized by higher absorption capability. In particular, an absorption capability higher than 50% is achieved in the case of bimorph systems prepared with suspension containing 0.5 mg/mL TiO<sub>2</sub> + 0.5 mg/mL SWNT and 0.25 mg/mL TiO<sub>2</sub> + 0.5 mg/mL SWNT.

From the catalytic viewpoint, faster MB degradation can be achieved under UV irradiation in the case of 0.25 mg/mL TiO<sub>2</sub> + 0.5 mg/mL SWNT, 1 mg/mL TiO<sub>2</sub> + 0.5 mg/mL SWNT and 0.5 mg/mL TiO<sub>2</sub> + 0.5 mg/mL SWNT suspensions.

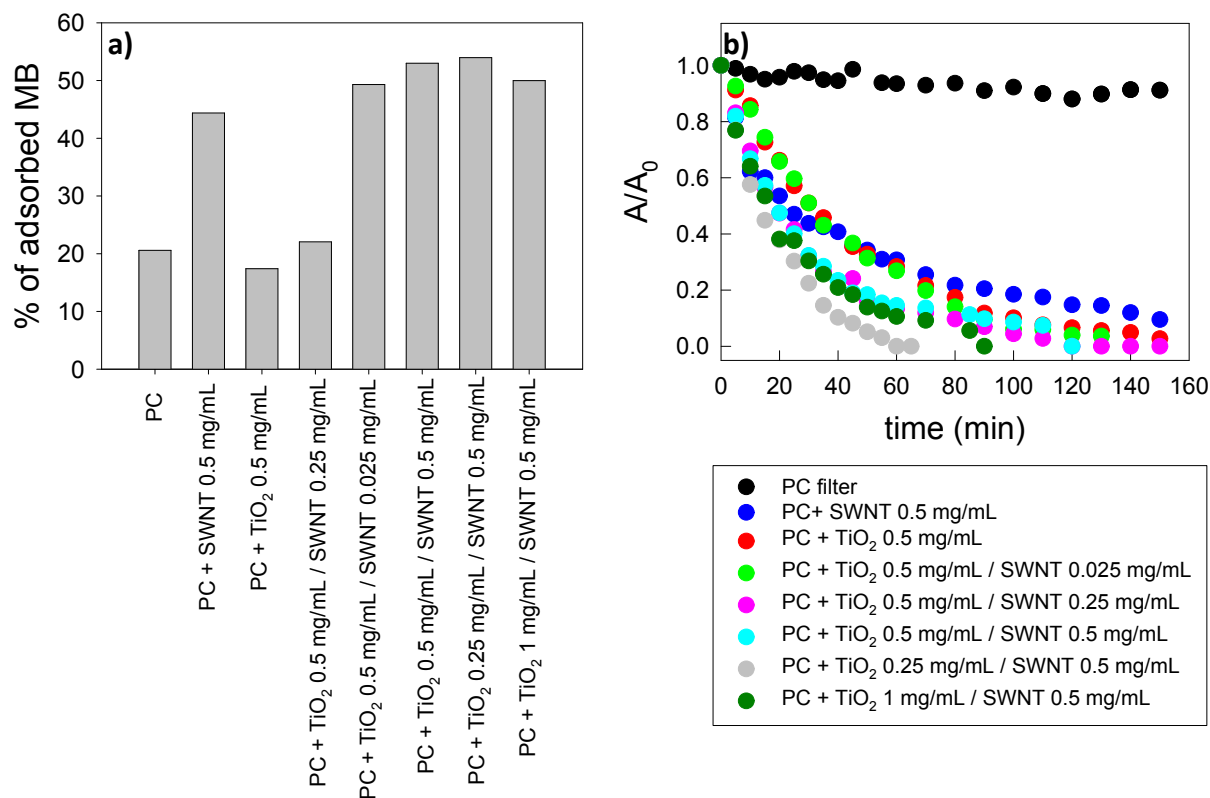

**Figure S3.** Photodegradation activity of bimorph systems during the degradation of MB  $10^{-5}$  M solutions. a) percentage of adsorbed dye on the solid substrate after 1h in dark; b) photocatalytic degradation of MB solutions as a function of time, under UV irradiation.

**S4. Supplementary Movie:** Real-time video showing the typical setup and the typical employment of a photocatalyst for the triggering of a generic chemical reactions (file uploaded separately).

**S5. Supplementary Movie:** Real-time video illustrating the use of a photocatalyst for the triggering of the redox reaction between glycerol and potassium permanganate (file uploaded separately).

## S6. TiO<sub>2</sub>-catalysed photopolymerization of pyrrole

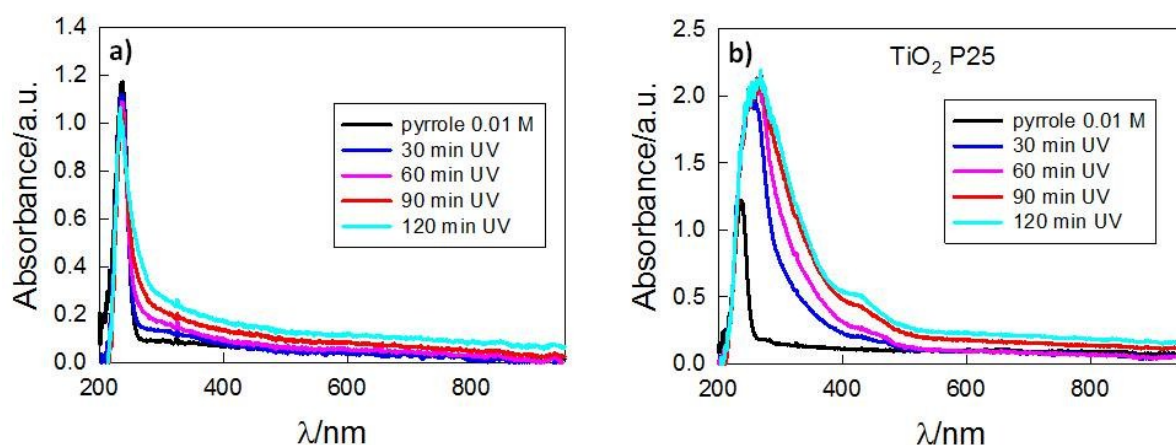

**Figure S6.** Study of the photo-polymerization of pyrrole in the absence (a) and in the presence (b) of TiO<sub>2</sub> P-25 NPs (0.8 mg/mL). a.) UV-Vis spectra of a pyrrole solution 0.01 M during 120 min of UV illumination in the absence of TiO<sub>2</sub> NPs. Over the time, no modifications can be detected; b) UV-Vis spectra of a pyrrole solution 0.01 M during 120 min. of UV illumination. Over the time, the pyrrole absorption peak moves from  $\lambda_{\text{max}}=206$  nm to  $\lambda_{\text{max}}=250$  nm and a broad band appears at  $\lambda\sim 460$  nm, indicating the formation of poly-pyrrole units (*see Ref [55] in the main text*).

**S7. Supplementary Movie:** Video illustrating the use of a phactalyst for triggering of the photo-polymerization of pyrrole (file uploaded separately).

## S8. The phactalyst under UV illumination

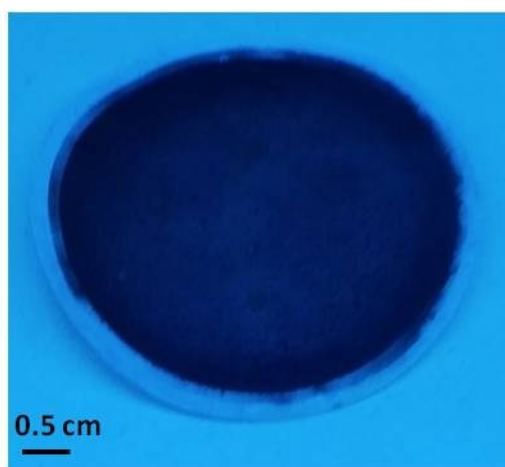

**Figure S8.** Optical image of a phactalyst under UV illumination: the sample remains flat.

## S9. Degradation of methylene blue

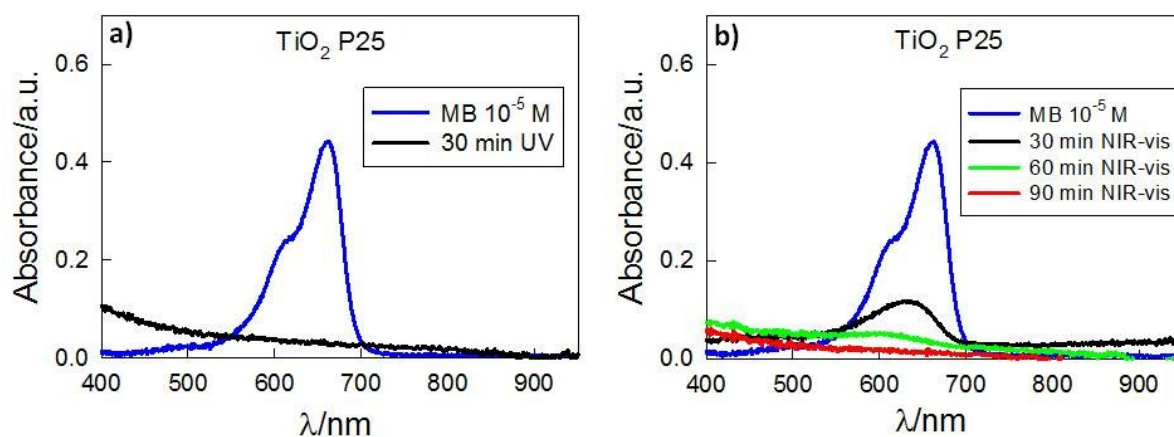

**Figure S9.** Study of the photodegradation reaction of methylene blue (MB) in the presence of TiO<sub>2</sub> P-25 NPs (0.5 mg/mL) under UV (a) or Vis/NIR illumination (b). a) UV-Vis spectra of methylene blue solution 10<sup>-5</sup> M before and after 30 min of UV illumination. Within 30 min., the MB is completely degraded, as demonstrated by the disappearance of the MB absorption peaks at  $\lambda$  600-700 nm; b) UV-Vis spectra of methylene blue solution 10<sup>-5</sup> M before and after 90 min of Vis-NIR illumination. Each spectrum is recorded every 30 min. The self-degradation is complete after 90 min.

## S10. Fields of application of photoactuators: synoptic review

| Application                      | Type of photoactuator                                                                  | Reference |
|----------------------------------|----------------------------------------------------------------------------------------|-----------|
| Weight displacement              | CNT-paraffin wax/polyimide                                                             | 2         |
|                                  | (1,2-bis(5-methyl-2-phenyl-4-thiazolyl)perfluorocyclopentene                           | 16, 17    |
|                                  | 1,2-bis(2-methyl-5-(1-naphthyl)-3-thienyl)perfluorocyclopentene • perfluoronaphthalene | 18        |
|                                  | HNAN/PVD/HFP                                                                           | 29        |
|                                  | graphene-chitosan/polyethene                                                           | 45        |
| Self-movement                    | Liquid crystal elastomer                                                               | 3         |
|                                  | PC/SWNT                                                                                | 34        |
|                                  | Polydopamine-modified rGO                                                              | 39        |
|                                  | rGO-ELP                                                                                | 41        |
|                                  | rGO-CNT/PDMS                                                                           | 42        |
|                                  | graphene-chitosan/polyethene                                                           | 45        |
| graphene nanoplatelets-PDMS/PDMS | 47                                                                                     |           |
| Self-folding origami             | GO/PVD-HFP                                                                             | 40        |
|                                  | rGO-CNT/PDMS                                                                           | 42        |
|                                  | SWNT/pNIPAm                                                                            | 43        |
|                                  | Black ink/Shrinky Dinky polystyrene                                                    | 44        |
| Valves for microfluidics         | spiropyran functionalized hydrogel                                                     | 24        |

**Table S10.**

**S11. Photoactuators obtained by combining graphene suspension, polycarbonate filters and TiO<sub>2</sub> NPs.**

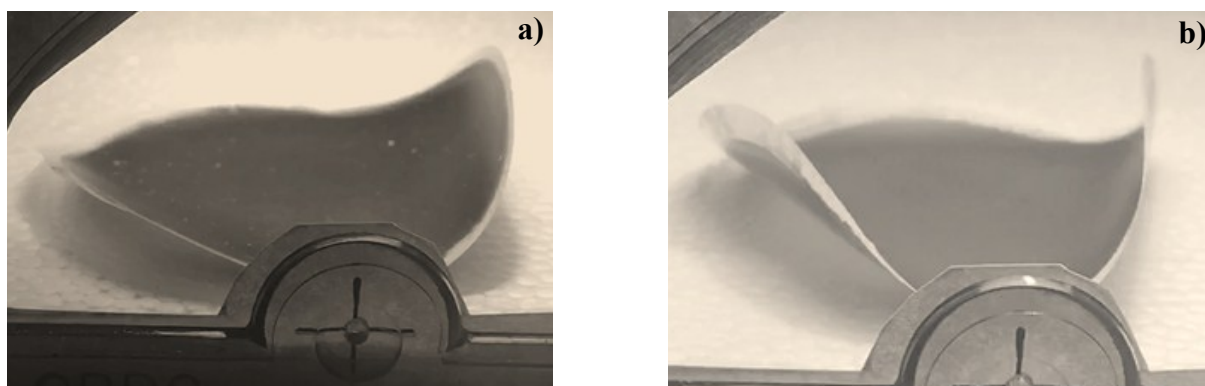

**Figure S11.** a) optical image of a photoactuator obtained by filtering commercial graphene suspension on PC filters under Vis/NIR illumination; b) optical image of a photoactuator obtained by filtering graphene/TiO<sub>2</sub> suspension on PC filters under Vis/NIR illumination.
